# Supplementary material
Source: PubMed Central journal article supplement (PMC7983743)
Supplement: rycan200006suppa1.pdf [file rycan200006suppa1.pdf]

**Table E1. Quantitative Analysis of Tumor Volume Changes over Time**

| Treatment Group | Tumor Volume (mm <sup>2</sup> )* |                    |                     |
|-----------------|----------------------------------|--------------------|---------------------|
|                 | Day 1 <sup>†</sup>               | Day 7 <sup>†</sup> | Day 14 <sup>†</sup> |
| Control         | 41.7 ± 1.2                       | 67.9 ± 12.8        | 110.2 ± 31.9        |
| DLE             | 41.2 ± 1.7                       | 51.6 ± 12.9        | 62.4 ± 13.3         |
| DLE + EM        | 40.5 ± 1.3                       | 44.1 ± 5.4         | 53.3 ± 11.5         |
| DLE + SOR-EM    | 40.7 ± 1.2                       | 40.4 ± 10.6        | 33.6 ± 7.1          |

\*Tumor volume =  $(a^2 \times b)/2$ , where  $a$  is tumor width and  $b$  is tumor length ( $a \leq b$ ), as measured by using MRI. Data are mean values plus or minus standard deviations.

<sup>†</sup>Day after initial tumor inoculation.

**Table E2. Quantitative Analysis of TUNEL- and CD34-Positive Areas in Tumor Tissue**

| Stain Type | Signal-Positive Area (%)* |              |              |              |
|------------|---------------------------|--------------|--------------|--------------|
|            | Control                   | Group 1      | Group 2      | Group 3      |
| TUNEL      | 0.34 ± 0.09               | 38.95 ± 7.25 | 31.52 ± 4.49 | 62.69 ± 5.95 |
| CD34       | 1.81 ± 0.41               | 3.42 ± 0.64  | 4.82 ± 0.73  | 0.30 ± 0.19  |

\*Signal-positive area = signal-positive area/total tumor area × 100, as analyzed by using Image J software. Data are mean values plus or minus standard deviations.
